# Supplementary material for: Mono-, di- and tetra-zinc complexes derived from an amino-benzotriazole phenolate ligand containing a bulkier N-alkyl pendant arm: synthesis, structure and catalysis for ring-opening polymerization of cyclic esters
Source: Royal Society of Chemistry journal article supplement (doi:10.1039/c4dt02906b), 2015-01-01
Supplement: c4dt02906b1.pdf [file c4dt02906b1.pdf]

**Mono-, di- and tetra-zinc complexes derived from an amino-  
benzotriazole phenolate ligand containing a bulkier *N*-alkyl pendant  
arm: synthesis, structure and catalysis for ring-opening  
polymerization of cyclic esters**

*Jun-Han Wang,<sup>a</sup> Chen-Yen Tsai,<sup>b</sup> Jing-Kai Su,<sup>a</sup> Bor-Hunn Huang,<sup>\*b</sup> Chu-Chieh Lin<sup>\*b</sup> and Bao-Tsan Ko<sup>\*b</sup>*

**Fig. S1** ORTEP drawing of **1** with probability ellipsoids drawn at the 40% level. All hydrogen atoms except H1 are omitted for clarity.

**Fig. S2** Polymerization of  $\epsilon$ -CL catalysed by **2** in the presence of 9-AnOH. The relationship between Mn(■)/(PDI(□)) of polymer and the initial mole ratio  $[\epsilon\text{-CL}]_0/[\text{Zn}]_0$  is shown.

**Fig. S3** <sup>1</sup>H NMR spectrum of PCL-25 (Table 1, entry 5) initiated by **3**.

**Fig. S4** Polymerization of  $\beta$ -BL catalysed by **2** in presence of 9-AnOH. The relationship between Mn(■)/(PDI(□)) of polymer and the initial mole ratio  $[\beta\text{-BL}]_0/[\text{Zn}]_0$  is shown.

**Fig. S5** Polymerization of  $\beta$ -BL catalysed by **3**. The relationship between Mn(■)/(PDI(□)) of polymer and the initial mole ratio  $[\beta\text{-BL}]_0/[\text{Zn}]_0$  is shown.

**Fig. S6** <sup>1</sup>H NMR spectrum of PHB-25 (Table 2, entry 1) initiated by **2** in the presence of 9-AnOH.

**Fig. S7** <sup>1</sup>H NMR spectrum of PHB-25 (Table 2, entry 5) initiated by **3**.

**Table S1** Crystallographic data of complexes **1-5**



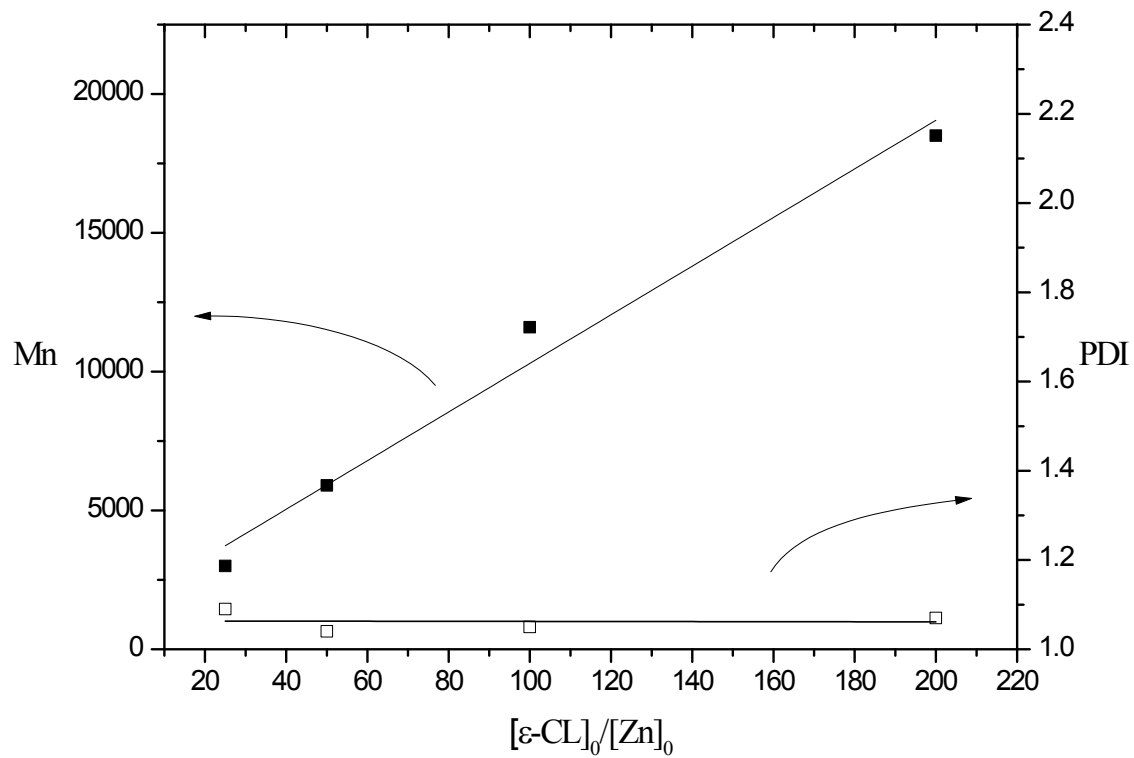

**Fig. S2** Polymerization of  $\epsilon$ -CL catalysed by **2** in the presence of 9-AnOH. The relationship between Mn(■)/(PDI(□)) of polymer and the initial mole ratio  $[\epsilon\text{-CL}]_0/[\text{Zn}]_0$  is shown.

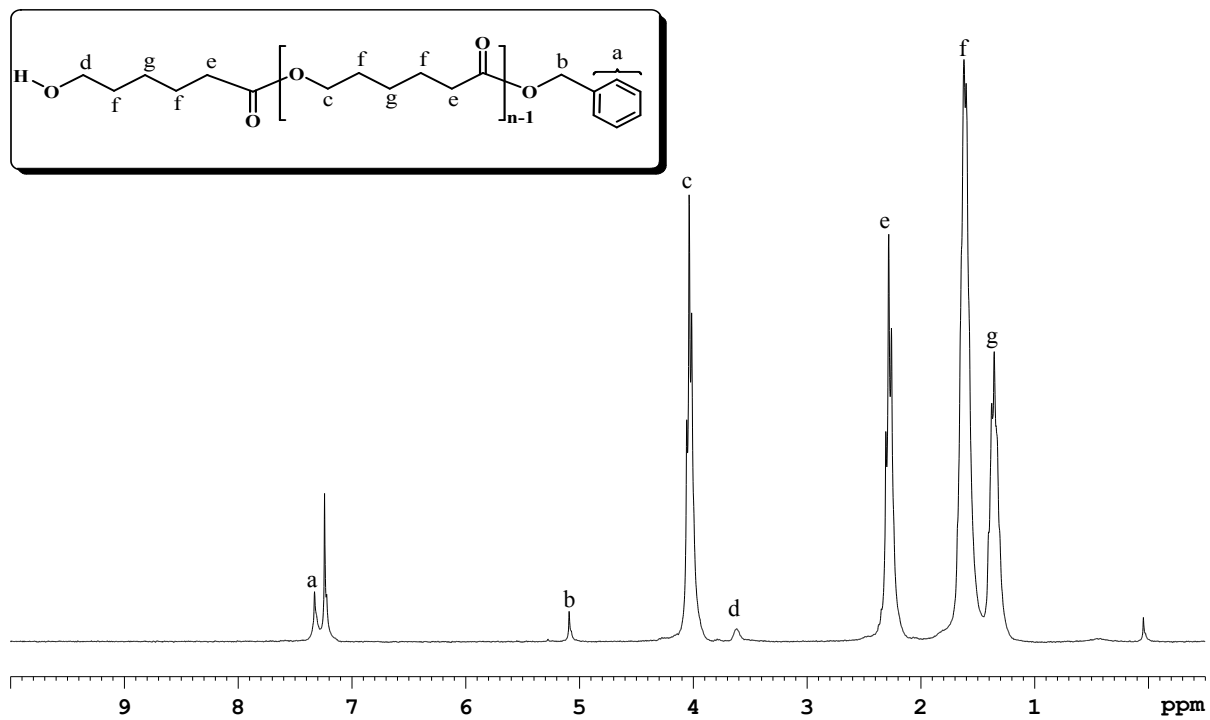

**Fig. S3**  $^1\text{H}$  NMR spectrum of PCL-25 (Table 1, entry 5) initiated by **3**.

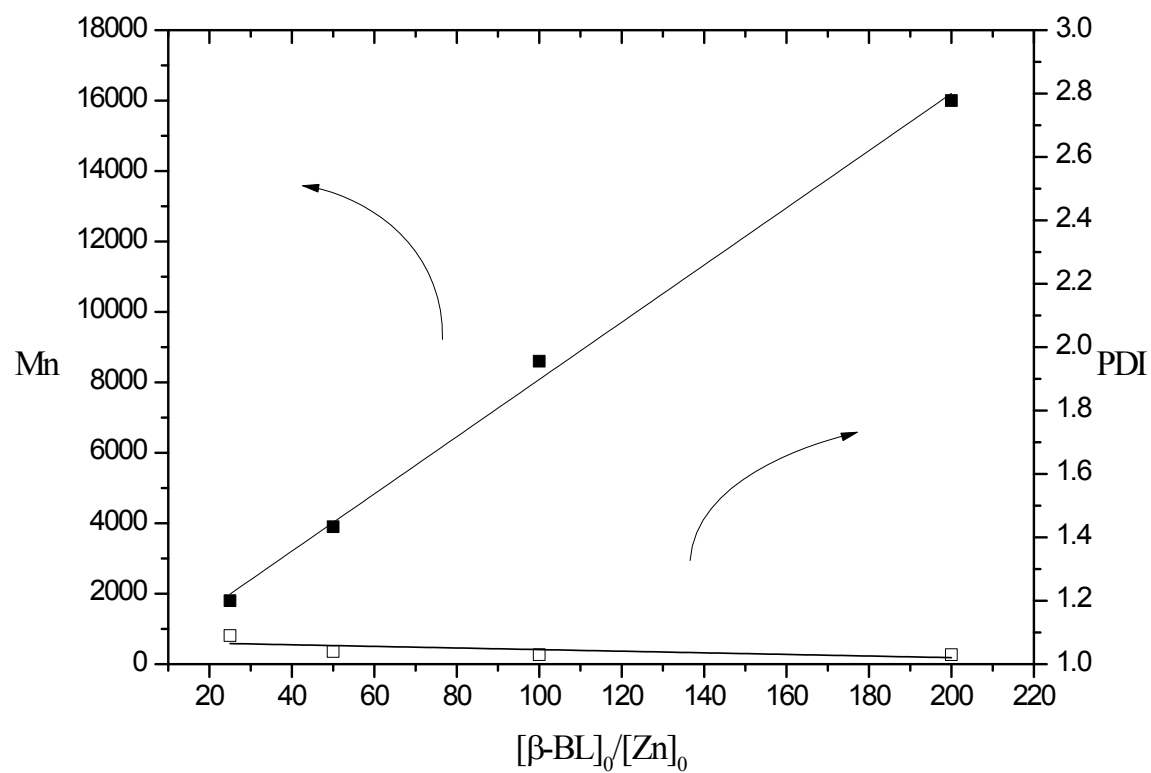

**Fig. S4** Polymerization of  $\beta$ -BL catalysed by **2** in presence of 9-AnOH. The relationship between Mn(■)/(PDI(□)) of polymer and the initial mole ratio  $[\beta\text{-BL}]_0/[\text{Zn}]_0$  is shown.

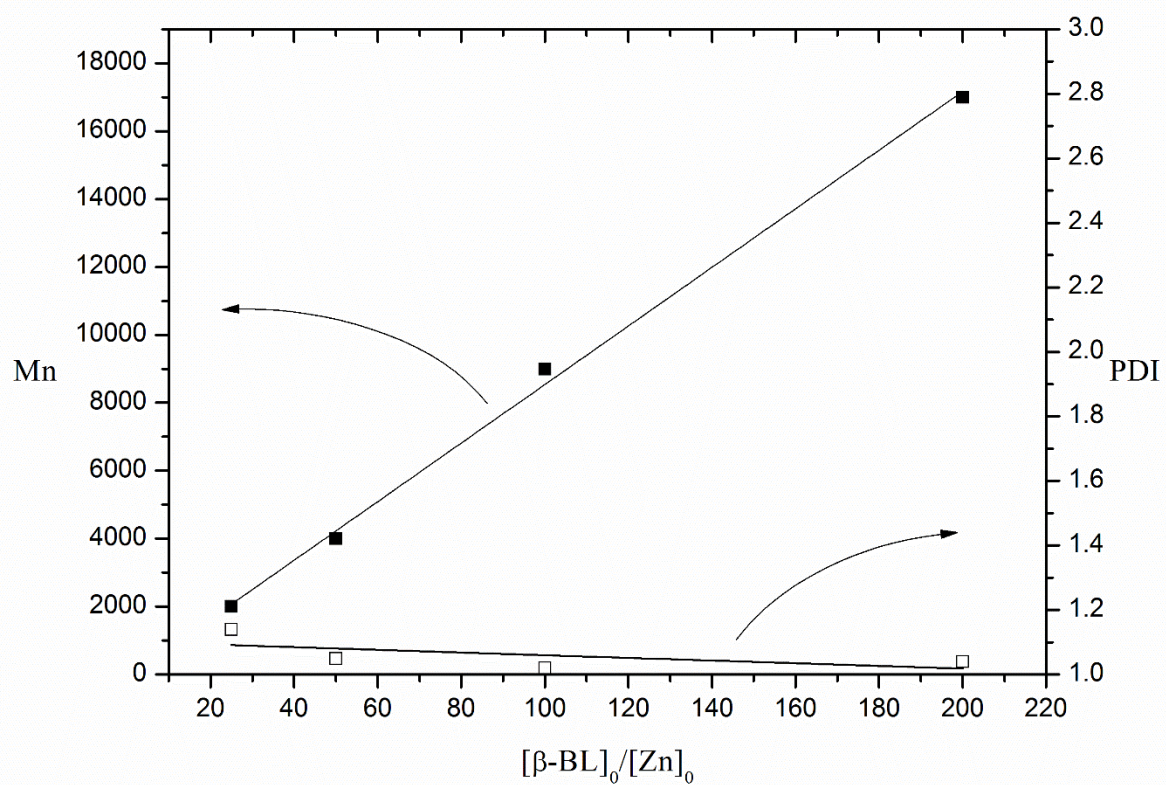

**Fig. S5** Polymerization of  $\beta$ -BL catalysed by **3**. The relationship between Mn(■)/(PDI(□)) of polymer and the initial mole ratio  $[\beta\text{-BL}]_0/[\text{Zn}]_0$  is shown.

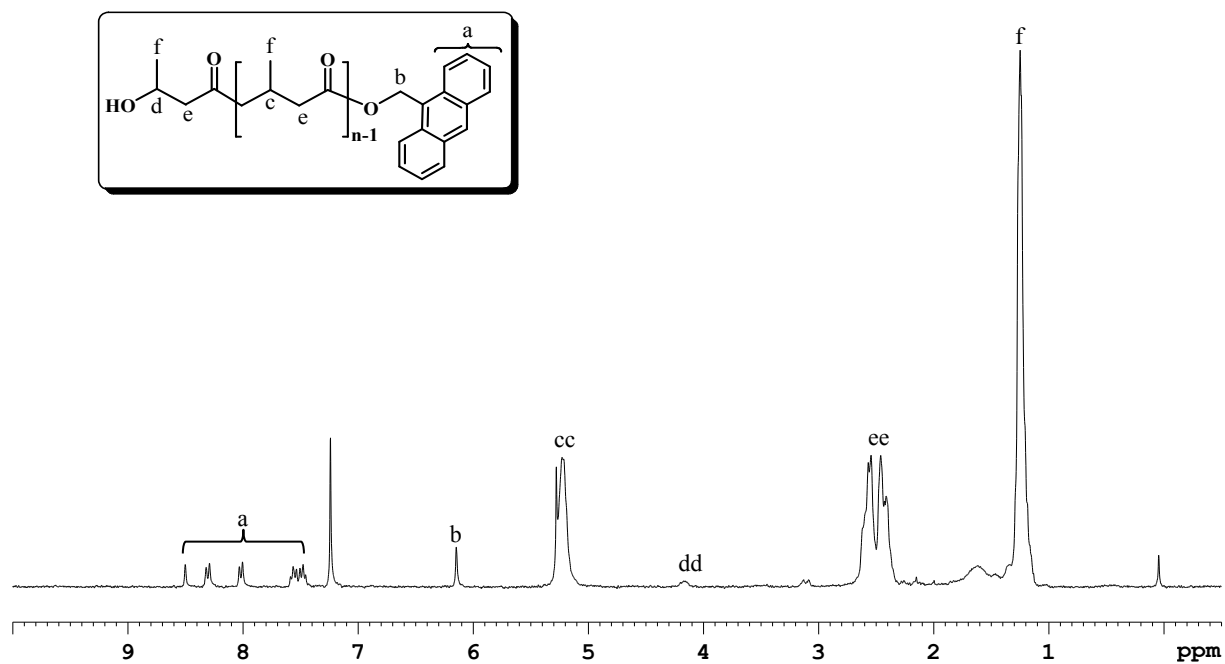

**Fig. S6** <sup>1</sup>H NMR spectrum of PHB-25 (Table 2, entry 1) initiated by **2** in the presence of 9-AnOH.

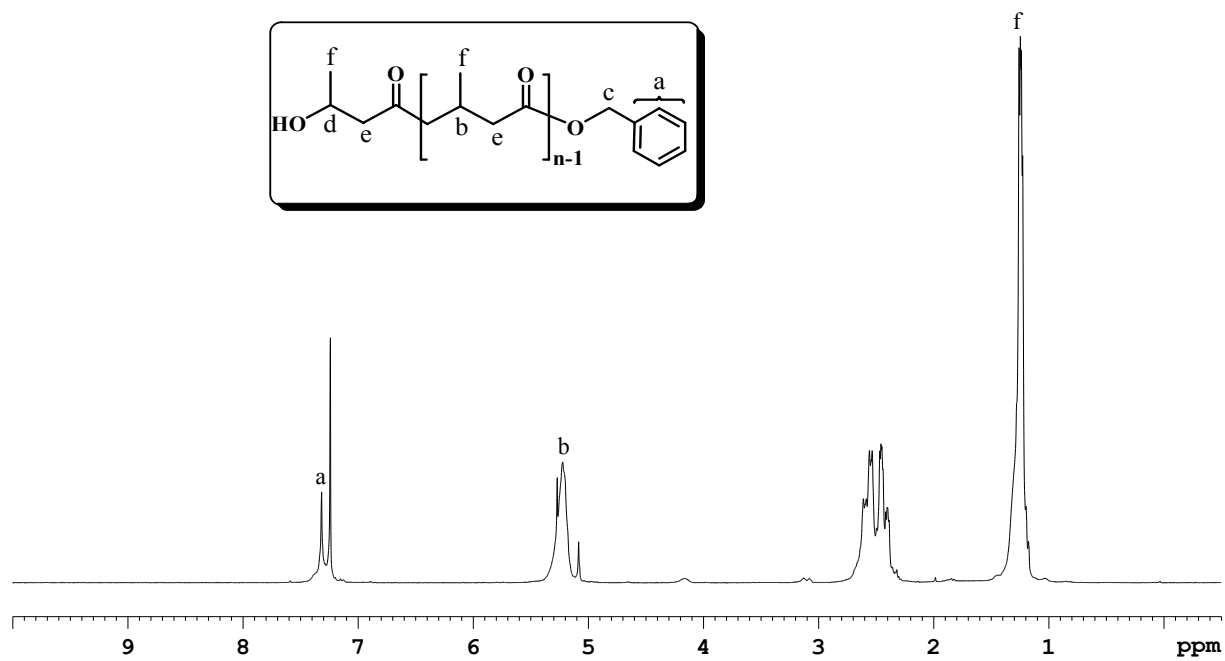

**Fig. S7** <sup>1</sup>H NMR spectrum of PHB-25 (Table 2, entry 5) initiated by **3**.



**Table S1** Crystallographic data of complexes **1-5**

|                                           | <b>1</b>                                         | <b>2</b>                                                                      | <b>3</b>                                                                         | <b>4</b>                                                                        | <b>5</b>                                                          |
|-------------------------------------------|--------------------------------------------------|-------------------------------------------------------------------------------|----------------------------------------------------------------------------------|---------------------------------------------------------------------------------|-------------------------------------------------------------------|
| Formula                                   | C <sub>27</sub> H <sub>40</sub> N <sub>4</sub> O | C <sub>58</sub> H <sub>88</sub> N <sub>8</sub> O <sub>2</sub> Zn <sub>2</sub> | C <sub>136</sub> H <sub>176</sub> N <sub>16</sub> O <sub>8</sub> Zn <sub>4</sub> | C <sub>82</sub> H <sub>102</sub> N <sub>12</sub> O <sub>4</sub> Zn <sub>2</sub> | C <sub>64</sub> H <sub>88</sub> N <sub>10</sub> O <sub>2</sub> Zn |
| Formula weight                            | 436.63                                           | 1060.10                                                                       | 2424.49                                                                          | 1450.50                                                                         | 1094.81                                                           |
| Temp (K)                                  | 173(2)                                           | 100(2)                                                                        | 100(2)                                                                           | 150(2)                                                                          | 100(2)                                                            |
| Crystal system                            | Monoclinic                                       | Triclinic                                                                     | Tetragonal                                                                       | Monoclinic                                                                      | Triclinic                                                         |
| Space group                               | <i>C 2/c</i>                                     | <i>P -1</i>                                                                   | <i>I -4 2 d</i>                                                                  | <i>C 2/c</i>                                                                    | <i>P -1</i>                                                       |
| a (Å)                                     | 12.1385(2)                                       | 10.8086(3)                                                                    | 29.5765 (4)                                                                      | 18.5857(7)                                                                      | 12.4319(2)                                                        |
| b (Å)                                     | 10.0974(2)                                       | 16.7967(4)                                                                    | 29.5765 (4)                                                                      | 15.3783(6)                                                                      | 15.4687(2)                                                        |
| c (Å)                                     | 41.5355(7)                                       | 18.1461(5)                                                                    | 16.4015 (2)                                                                      | 29.9998(10)                                                                     | 17.8328(3)                                                        |
| $\alpha$ (deg)                            | 90                                               | 66.4510(10)                                                                   | 90                                                                               | 90                                                                              | 68.3750(10)                                                       |
| $\beta$ (deg)                             | 92.4890(10)                                      | 74.5920(10)                                                                   | 90                                                                               | 98.205(3)                                                                       | 88.3680(10)                                                       |
| $\gamma$ (deg)                            | 90                                               | 76.1620(10)                                                                   | 90                                                                               | 90                                                                              | 76.6330(10)                                                       |
| $V(\text{Å}^3)$                           | 5086.09(16)                                      | 2878.33(13)                                                                   | 14347.5 (3)                                                                      | 8486.7(5)                                                                       | 3095.50(8)                                                        |
| Z                                         | 8                                                | 2                                                                             | 4                                                                                | 4                                                                               | 2                                                                 |
| $D_{\text{calc}}(\text{Mg/m}^3)$          | 1.140                                            | 1.223                                                                         | 1.122                                                                            | 1.135                                                                           | 1.175                                                             |
| $\mu$ (Mo K $\alpha$ )(mm <sup>-1</sup> ) | 0.070                                            | 0.880                                                                         | 0.716                                                                            | 0.617                                                                           | 0.447                                                             |
| $F(000)$                                  | 1904                                             | 1136                                                                          | 5152                                                                             | 3080                                                                            | 1176                                                              |
| Reflections collected                     | 23327                                            | 51272                                                                         | 68891                                                                            | 34040                                                                           | 56113                                                             |
| No. of parameters                         | 299                                              | 651                                                                           | 403                                                                              | 459                                                                             | 745                                                               |
| Indep. reflns ( $R_{\text{int}}$ )        | 6327(0.0227)                                     | 14206(0.0249)                                                                 | 8967 (0.0701)                                                                    | 9185(0.0287)                                                                    | 15357(0.0886)                                                     |
| $R1[I > 2\sigma(I)]$                      | 0.0457                                           | 0.0307                                                                        | 0.0444                                                                           | 0.0456                                                                          | 0.0469                                                            |
| $wR2 [I > 2\sigma(I)]$                    | 0.1151                                           | 0.0775                                                                        | 0.0995                                                                           | 0.1617                                                                          | 0.1292                                                            |
| Goodness-of-fit on $F^2$                  | 1.054                                            | 1.022                                                                         | 1.007                                                                            | 1.038                                                                           | 1.027                                                             |
